# Supplementary material for: A machine learning approach to address air quality changes during the COVID-19 lockdown in Buenos Aires, Argentina
Source: Copernicus journal article supplement (doi:10.5194/essd-2021-318), 2021-10-13
Supplement: Supplementary file 1 [file essd-2021-318-supplement.pdf]

## S1. Supplementary Material

### S1.1 Analysis of CNEA site during training period

#### S1.1.1 Temporal Variations

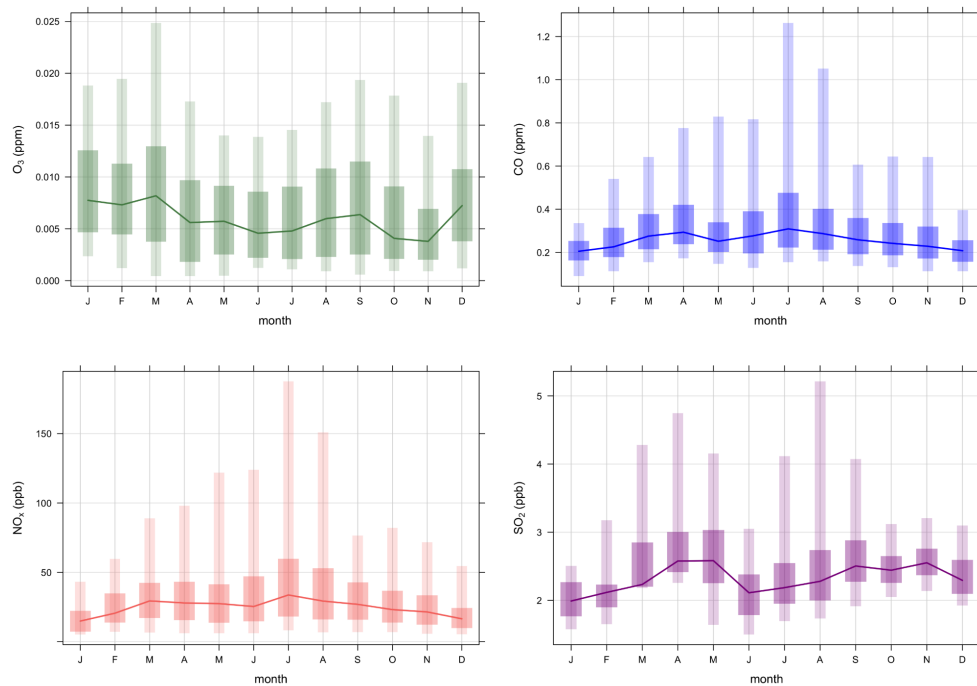

Fig. S1: Boxplot of training period ground-based observations for CNEA site.

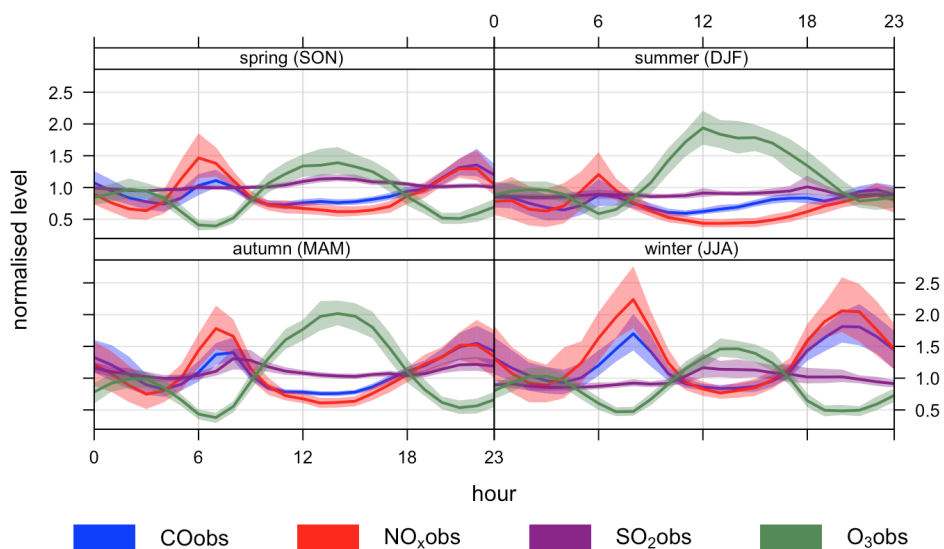

Fig S2: Seasonal diurnal cycles of training period ground-based observations for the CNEA site.

### S.1.1.2 Bivariate polar plots for training period

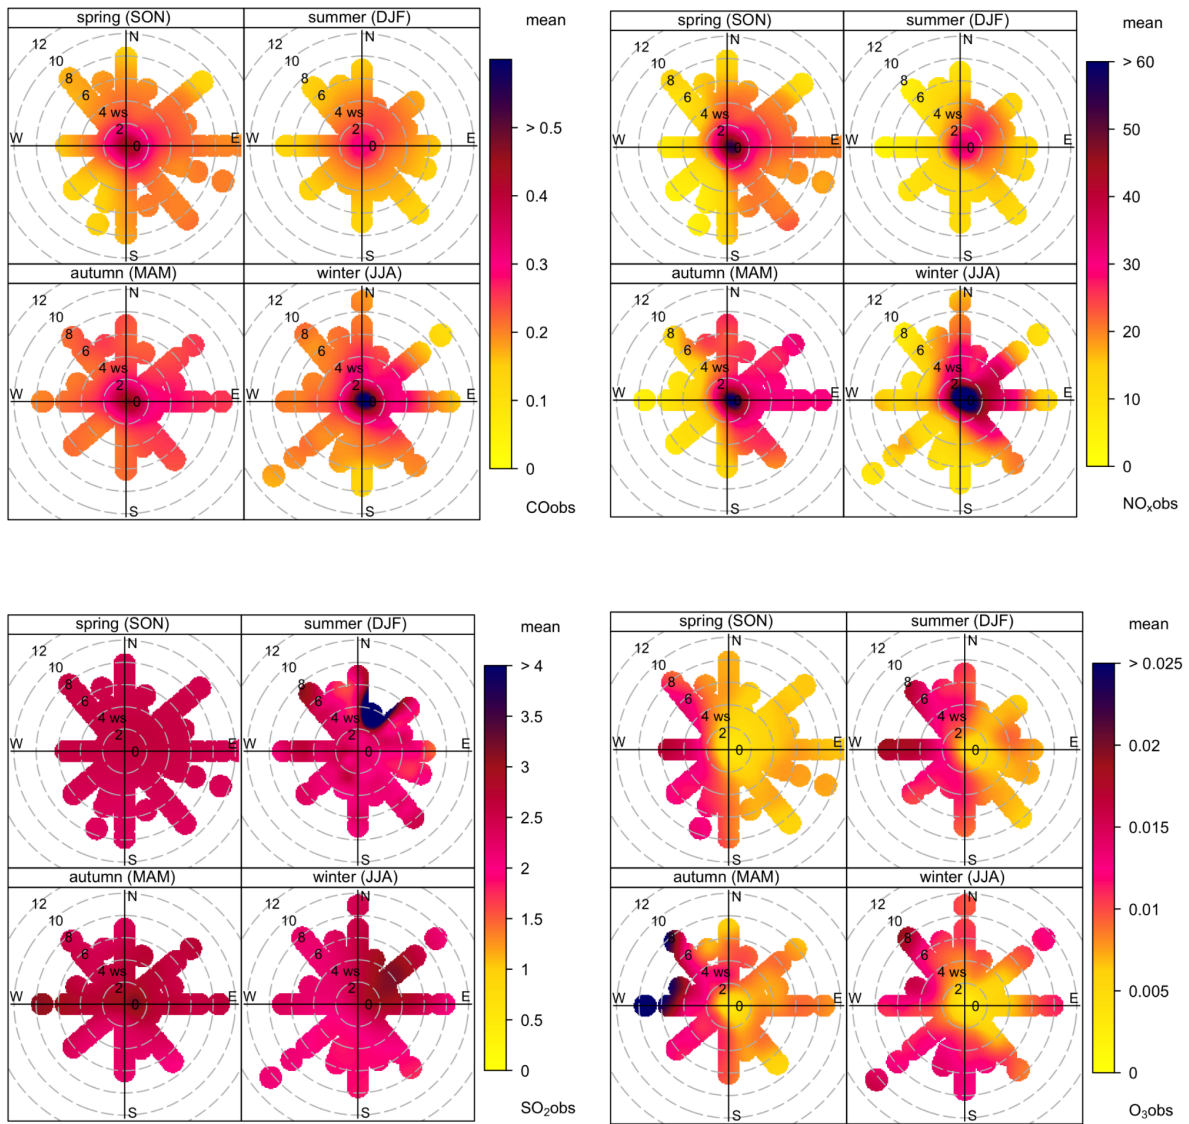

Figure S3: Seasonal bivariate polar plots for training period (CNEA site).

## S1.2 Analysis of CNEA site during testing period

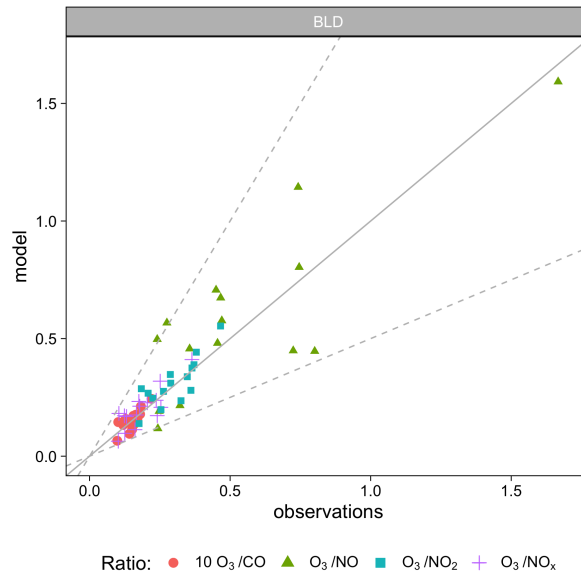

Figure S4. Scatter plot for O<sub>3</sub> ratios during testing period (BLD) in CNEA site. For better visualization O<sub>3</sub>-CO ratio was multiplied by 10. The 1:1 line is solid and the 1:0.5 and 1:2 lines are dashed. Values within the dashed lines represent the fraction of values that are within a factor of 2 of the observations. Pearson correlation coefficients:  $r_{O_3-CO} = 0.79$ ,  $r_{O_3-NO} = 0.85$ ,  $r_{O_3-NO_2} = 0.87$ ,  $r_{O_3-NO_x} = 0.89$ .

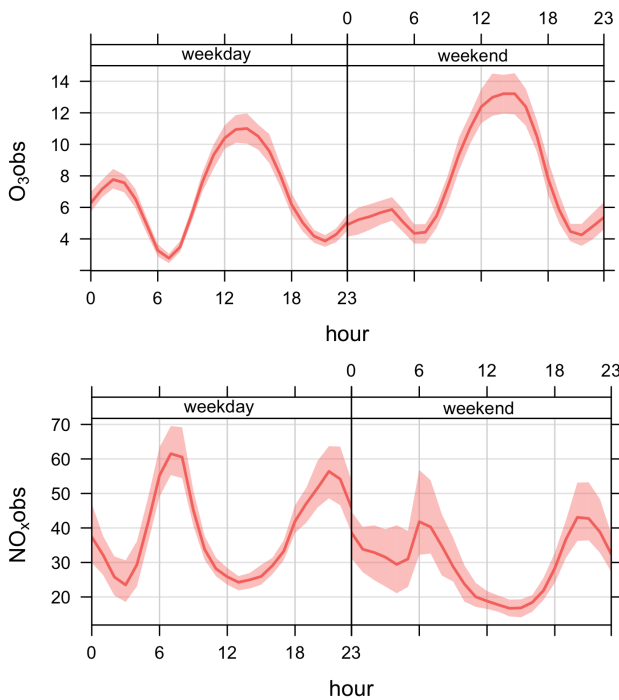

Figure S5. Mean diurnal cycle for weekends and weekdays for O<sub>3</sub> [ppb] and NO<sub>x</sub> [ppb] during the training period at CNEA site.

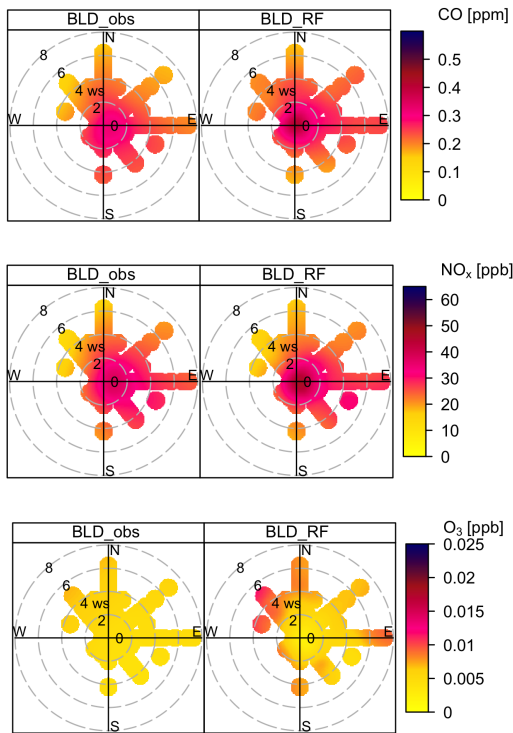

Figure S6. Bivariate Polar plots for testing period (BLD) for CNEA site.

### S1.3 Analysis of Parque Centenario site during testing period

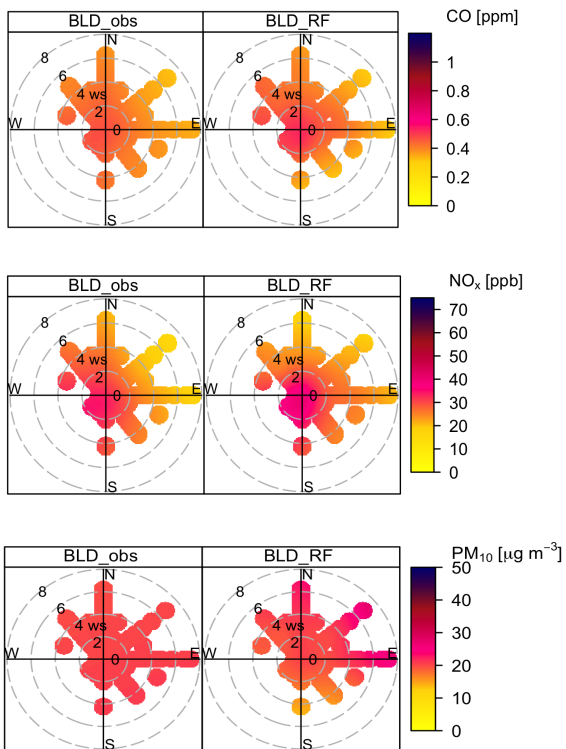

Figure S7. Bivariate Polar plots for testing period (BLD) for Centenario site.
